1 Full Title: Taking extreme measures: A quantitative study of multiple stress interactions at  
2 the limits of life.

3

4 Running Title: Effect of multiple-extremes on microbial growth.

5

6 Authors: Rosie Cane <sup>1,2</sup> # and Charles Cockell <sup>1,2</sup>.

7

8 <sup>1</sup> School of Physics & Astronomy, The University of Edinburgh, Edinburgh, UK.

9 <sup>2</sup> UK Centre for Astrobiology, The University of Edinburgh, Edinburgh, UK.

10

11

12

13

14

15

16

17

18

19 #Address correspondence to Rosie Cane, r.cane@ed.ac.uk.

20

21

22 Abstract

23 Environments exposed to simultaneously occurring extremes are prevalent in the natural  
24 world, yet analysis of such settings tends to focus on the effect of single environmental  
25 stresses. In this study, quantitative multiplicative and minimising models previously used to  
26 study nutrient limitation were applied to the growth of the hydrothermal vent-dwelling  
27 organism *Halomonas hydrothermalis* when subjected to combined nutrient limitation and  
28 NaCl-salt stress. Results showed an interactive effect from both salt and nutrient stresses  
29 under optimal conditions. However, the fit became more non-interactive as salinity is  
30 increased; at which point NaCl-salt had a more dominating effect on growth than inorganic  
31 phosphate (P<sub>i</sub>). We discuss biochemical hypotheses to explain these data. This work shows  
32 that models developed to understand nutrient limitation can be used to quantify and  
33 separate the contributions of stresses under other physical and chemical extremes, such as  
34 extreme salinity, and facilitate the development of biochemical hypotheses of how extremes  
35 may be influencing cell physiology.

36

37 Importance

38

39 Very few environments in the natural world are exposed to just one extreme or stress at a  
40 time. To understand life's ability to survive in multiple-extreme environments, we must be  
41 able to quantify how different extremes interact. Using methods developed for the study of  
42 multiple nutrient limitation, this study uses kinetic growth models to investigate the effect  
43 of extreme environments on bacterial growth. Results show that closer to the extremes of  
44 life, individual stresses dominate growth; whereas under optimal conditions there is a  
45 multiplicative effect from both salt and nutrient stresses. This approach offers a new way to  
46 quantify and potentially understand and develop hypotheses for how life operates under  
47 multiple extremes.

48

49 Introduction

50

51 Micro-organisms are able to tolerate a variety of stresses which has enabled them to  
52 colonise many environments once thought to be uninhabitable, known as extreme  
53 environments [1]. For decades, laboratory studies into extreme environments have tended  
54 focused on single extremes, such as temperature, pressure, pH and salinity [2]. Although  
55 this provides an insight and enhanced understanding of the absolute limits to life under a  
56 given physical or chemical extreme [3], very few environments in the natural world expose  
57 life to just the one stress [2]. Most microorganisms are exposed to multiple extremes and yet  
58 there have been relatively few studies conducted to research them. Those studies that do  
59 investigate multiple extremes tend to measure microbial growth parameters, but provide little  
60 analysis of how the component extremes influence the combined extreme responses.

61

62 However, methods have been used in other areas of microbiology to quantify the relative  
63 contributions of individual stresses to a combined stress response. This is particularly the  
64 case in the study of nutrient limitation. The concept of co-limitation has been explored by  
65 several studies in the fields of oceanography and food industry [4],[5], reviewing the effects  
66 of nutrient co-limitation on bacterial growth. Furthermore, studies such as Darvehei et al.,  
67 2018 [6] explore models developed on the behaviour of archaea cultures, a domain of life  
68 often encountered in multiple extreme environments, built to account for individual effects of  
69 light, nutrients, temperature, pH and dissolved oxygen; highlighting the significant need of a  
70 method to explore multiple-stresses.

71

72 Synchronously occurring stresses were first explored over 40 years ago [7], introducing the  
73 terms 'interactive' and 'non-interactive' to describe the relationship between two nutrient  
74 stressors. An interactive response illustrates both substrates to affect the overall growth rate  
75 of an organism in a synergistic manner, and a non-interactive response shows that an  
76 organism can only be limited by one substrate at a time.

77  
78 Previous attempts to quantify interactions between stresses generally focus on models  
79 specific to particular stressors. For example, Ross et al 2003 [8] employed a square root  
80 model with stress-specific parameters to investigate the effect of temperature, water activity,  
81 pH and lactic acid concentration, while Leiss et al 2015 [9] used a 'Stress Addition Model'  
82 model to study stressors in aquatic systems. These are limited in use since they do not allow  
83 for the examination of a range of different stresses with the same approach. Advancing on  
84 this work, the aim of this study is to produce a simple quantitative method that can be  
85 applicable to all stresses, and not limited by specific functions.

86  
87 In this study, we investigated how nutrient limitation concepts can be translated into the  
88 study of the effects of multiple extremes on microorganisms. We use the Monod  
89 Multiplicative Model [10] and Liebig's Law of the Minimum [11] as a basis – both simple and  
90 continuous algebraic relationships which lend themselves readily to theoretical analysis [7].  
91 Monod kinetics provide an interactive model, allowing for the investigation of the  
92 multiplicative effects of stresses, and Liebig kinetics provide a non-interactive model,  
93 allowing for the investigation of a 'minimising' approach, whereby one stressor dominates  
94 the stress response. These two kinetic growth models have been widely compared in a  
95 nutrient-limitation context ([12]-[14] etc). Here we use them to quantify effects of combined  
96 extremes.

97

## 98 Results

99

### 100 **Growth results of *Halomonas hydrothermalis* under Salt and P<sub>i</sub> stresses**

101

102 Results investigating the growth of *Halomonas hydrothermalis* under salt and P<sub>i</sub> stresses  
103 show how growth rate varies under differing concentrations of each stressor. **Figure 1**  
104 shows the effect of low, optimum and high salinities (defined here as 0, 3-4 and 8% [wt/vol])

105 respectively), each at low (0.3 M) and optimum (varying with NaCl concentration)  $P_i$   
106 concentrations on growth rate. In this study, optical density data was transferred to Microsoft  
107 Excel where growth curves were produced, using the exponential phase to produce growth  
108 rates, acquired using equation 1 (See Figure 2 (b)).

109

110 Growth rate results show a general positive correlation between growth rate and increase in  
111 NaCl up until an optimal growth rate was reached, followed by a negative correlation as  
112 growth rates decreased. Optimum growth was achieved at 4% (wt/vol) NaCl and 0.18 M  $P_i$ .  
113 Under optimal conditions for both stressors, the organism exhibited an average growth rate  
114 of 0.278. No growth was observed below 0.3M  $P_i$  or above 8% (wt/vol) NaCl at non-optimal  
115  $P_i$  concentrations.

116

117 A multiple-regression ANOVA was implemented (**Table 1**), with a subsequent box-cox  
118 transformation to reduce data skew. After accounting for variation in time, statistical tests  
119 showed that all factors were significant. Following this, a Post-hoc Tukey Honest  
120 Significance Difference (HSD) test was carried out to identify the interaction between  
121 stresses, which produced Least Squares Mean values, indicating pair-wise similarities  
122 between low and high salt concentrations. Homogeneity of variables was also assessed with  
123 an  $F$ -test, giving a  $p$ -value of  $<0.05$ . Following this, unequal variances were taken into  
124 account for the  $t$ -test.

125

## 126 **Fit of quantitative methods**

127

128 To present the data obtained in this study, we have organised it into a four-plot schematic.  
129 The fit of the two quantitative methods is visualised as four heat maps (Figure 2); a) the fit of  
130 the multiplicative and minimizing models, b) growth rate values, c) the similarity of fit  
131 between these two models and d) whether salt or  $P_i$  dominates growth.

132

133 Map (a) shows fit of the multiplicative (dark blue) and minimizing models (light blue). The  
134 majority of the combinations of the two stresses have a better fit to the multiplicative model  
135 with the exception of: 3% (wt/vol) NaCl and 0.06 M  $P_i$ , 4% (wt/vol) NaCl and 0.25-0.18 M  $P_i$   
136 and at a combination of high salt and  $\geq$  optimal  $P_i$  concentrations. Map (b) presents growth  
137 rate values at different concentrations of  $P_i$  and salinity. It can be seen that the highest  
138 growth rates (light blue) occur under optimal salt and  $P_i$  concentrations, and that growth rate  
139 decreases (darker blue) as high and low salt stresses are reached. Optimal  $P_i$   
140 concentrations (grey line of best fit) varied with salinity, starting at 0.09 M at 1%, increasing  
141 to 0.18 M at optimal salt, and then decreasing to 0.12 M at 8% (wt/vol). Optimal salinity  
142 (black line of best fit) was shown to vary from 3 to 4% (wt/vol), with highest growth observed  
143 under optimal  $P_i$  concentrations.

144

145 Similarity between the fit of both multiplicative and minimizing models can be seen in Map  
146 (c). A highly similar fit, i.e. both multiplicative and minimising models closely fit (light blue) is  
147 generally observed at the edges of the heat map at more extreme salinities, and more  
148 centrally under optimal salt and  $P_i$  concentrations. Map (d) displays whether  $P_i$  or salinity is  
149 having the greatest effect on growth at any given combination of the two stresses. Given that  
150 the majority of fit is to the multiplicative model, this shows where one stress is having more  
151 of an effect than the other. It can be seen that at high  $P_i$  and both high and low salt  
152 concentrations that the effect of high/low salinity has a greater effect on growth. At lower  $P_i$   
153 concentrations and optimal salinities,  $P_i$  generally affects growth more than salinity.

154

155 At low salt concentrations (1-2% [wt/vol]), growth is mainly dominated by the effects of a lack  
156 of NaCl, with fit corresponding to the multiplicative model. However, the similarity between  
157 fits of the two models at 1% (wt/vol) salinity and 0.03-0.12 M  $P_i$  is very high. Additionally, at  
158 optimal salt concentrations (3-4% [wt/vol]),  $P_i$  affects growth the most at lower  $P_i$   
159 concentrations, and salt affects growth the most at higher  $P_i$  concentrations. Figure 2 (A)  
160 shows nearly a complete multiplicative fit, aside from at 4% (wt/vol) and 0.15-0.18 M  $P_i$ , and

161 also 3% NaCl and 0.06 M  $P_i$ , where the fit is very similar between multiplicative and  
162 minimizing. At high salt concentrations (5-8% [wt/vol]), as salinity increases, fit becomes  
163 closer to that of the minimizing model. When 8% (wt/vol) NaCl is reached, a similarity in fit  
164 between both multiplicative and minimizing models can be observed between 0.12, 0.15 and  
165 0.18 M of  $P_i$ . A fully-minimizing fit is observed at 8% (wt/vol) NaCl and 0.21 M of  $P_i$ .

166

167

## 168 Discussion

169

170 A large number of multiple-extreme environments exist in the natural world, yet very little has  
171 been done to investigate interactions between extremes. In particular, studies tend to focus  
172 on the physiological effects of one extreme or combined extremes without attempting to  
173 understand quantitatively how those individual extremes interact to regulate growth. In this  
174 study, we carried out experiments to investigate whether models developed to understand  
175 the interactions of nutrient stress could be applied to quantifying the contributions of stresses  
176 that include the physical and chemical extremes of life. Here we studied the effects of salt  
177 (NaCl) stress and  $P_i$  limitation on bacterial growth. Both NaCl and  $P_i$  can affect growth  
178 individually, but when combined an interaction can be anticipated between the two stressors  
179 [15].

180

## 181 **Experimental growth rates**

182

183 Lowest rates of growth can be observed under the highest and lowest salinities at non-  
184 optimal  $P_i$  concentrations. This occurs when these extremes are approached, more severe  
185 limitation occurs and there is less growth. However, at optimal  $P_i$  and salt concentrations,  
186 where there are minimal stresses present to hinder the growth of bacterial cells, rates of  
187 growth are much higher.

188

189

190 **Multiplicative and Minimizing growth dynamics**

191

192 The majority of combinations of  $P_i$  and salt stresses have best fit to the multiplicative model.

193 We interpret this to show that most combinations of salt and  $P_i$  limitation stress are

194 interactive when not at the absolute limit. This can be understood at the biochemical level.

195 We would expect that when an organism is not growing at the limit of the imposed stresses

196 no stress would dominate and determine the threshold of growth. Rather, away from the

197 extreme edges any imposed stress will add to the total energetic demand and/or biochemical

198 response in a multiplicative way.

199

200 At 4% (wt/vol) and 0.15-0.18 M  $P_i$  there is a high similarity between fit to multiplicative and

201 minimizing models. These conditions represent optimal salt and  $P_i$  concentrations, and as no

202 stresses are acting upon the bacterium in this instance, an exact fit to either model should

203 not be anticipated.

204

205

206 **NaCl-salt and  $P_i$  stress effect on growth at extremes**

207

208 At low salt concentrations, growth is observed to be mainly dominated by salinity. This fit

209 corresponds with the multiplicative model, and although salt is observed to have a more

210 prevalent effect than  $P_i$ , both stresses are still affecting growth.

211

212 When at optimal salt concentrations, although still under multiplicative kinetics,  $P_i$  has a

213 greater effect on growth than salt. In this instance, salt would not be anticipated as a limiting

214 factor as the bacterium maintains optimal salt concentrations for cell regulation.

215



216 At high salinities, the effect of high salt concentrations dictates growth. As salinity increases,  
217 salt has a greater effect on bacterial growth, until the fit is best to the minimizing model at  
218 8% (wt/vol) and 0.21 M  $P_i$ . *Halomonas* and other members of the *Halomonadaceae* family  
219 have been shown by Gunde-Cimerman et al, 2018 [16] to use organic solutes for osmotic  
220 stabilization and to maintain low cytoplasmic ionic concentrations under highly saline  
221 conditions – a system called the ‘compatible solute strategy’ [17]. If this is the case for  
222 *Halomonas hydrothermalis*, an explanation of the minimizing fit at high salt and  $P_i$  conditions  
223 could be energetic constraints. Under these conditions, energy demands might be  
224 dominated by osmotic regulation to the point where this demand dominates cell responses.  
225 In support of this, Rai et al, 2005 [18] found that  $P_i$  uptake in the cyanobacterium *Anabaena*  
226 *doliolum* was significantly reduced with an increase in salinity, suggesting that  $P_i$  could not  
227 be efficiently transported into cells. The study concluded that energy constraints that may  
228 have caused an absence of strategies to uptake  $P_i$  under high salt concentrations, as  $P_i$   
229 uptake is an energy-dependant process. Thus although under these conditions, phosphate  
230 would be limiting, high salinity would ultimately be the controlling factor in growth.

231  
232 Another explanation could be nutrient over-exposure under high salt concentrations.  
233 Previous studies have focussed on  $P_i$  limitation at high salinities, but not on high  
234 concentrations of the nutrient. The general bacterial response mechanism for  $P_i$  uptake in  
235 conditions with an abundance of  $P_i$  is the  $P_i$ -Inorganic Transport (Pit) model [19]. An excess  
236 in  $P_i$  in highly saline environments can have an adverse effect on regulation of  $P_i$   
237 metabolisms via the Pit model [20], and indeed very few bacterial strains with  $P_i$  solubilizing  
238 abilities can function well at high concentrations of NaCl [21]. High salt concentrations are  
239 effectively cutting off the ability of the organism to regulate  $P_i$ ; leading to salinity dominating  
240 growth through the minimizing model.

241  
242 Yet another hypothesis could be linked to the uptake of potassium (K). In saline  
243 environments, some cells accumulate  $K^+$  ions to balance osmotic concentrations inside and

244 out of cells – the ‘salt-in strategy’ [22]. In addition,  $P_i$  transport systems are dependant upon  
245 the presence of  $K^+$  [19]. This indicates that at higher salt concentrations, cells may be taking  
246 up  $K^+$  for osmoregulation processes, and depleting available  $P_i$ . Uptake of potassium ions  
247 might change the ionic associations of  $K^+$  with  $P_i$  ions, indirectly affecting the ease by which  
248  $P_i$  can be taken up by cells. If the presence of high  $Na^+$  and  $Cl^-$  concentrations influences  $P_i$   
249 concentrations, then at extremes of NaCl, it might be observed to dominate growth.

250

251 These data show how multiplicative and minimising models can be used to generate  
252 biochemical hypotheses, which could be tested with further laboratory experiments. In this  
253 case, more needs to be known about how  $P_i$  and NaCl interact and the molecular  
254 mechanism(s) of  $P_i$  solubilization in salt-stressed environments to explain the kinetic data  
255 obtained.

256

## 257 **Conclusion**

258

259 Although a great many studies investigate the effects on one extreme on microbial growth or  
260 the combined effects of multiple extremes on growth, here we have used kinetic models to  
261 show how concepts borrowed from studies on the effects of nutrient limitation can be  
262 expanded to study the interactions of multiple extremes and to tease their effects apart. We  
263 have shown that by not only measuring growth rates, but by defining the role of multiplicative  
264 or minimising interactions at extremes, not only can the interactions of combined extremes  
265 be quantified, but that they lead to the development of new hypotheses. In this case, the  
266 hypotheses offered to explain the growth minimising domination of salt stress over  $P_i$  stress  
267 at high salt and  $P_i$  levels could be investigated by proteomics, for example. We conclude that  
268 the methods developed to examine nutrient limitation stresses offer a powerful way to  
269 quantify and examine the behaviour of life in extreme environments.

270

271 As well as informing an understanding of how life adapts to extremes, this work has  
272 implications for the assessing the habitability of extra-terrestrial environments. The models  
273 described here might be used to investigate the growth of organisms grown under extremes  
274 relevant to extraterrestrial environment to develop hypotheses on how much extremes would  
275 be expected to limit life, for example contaminant microorganisms transferred to other  
276 planetary bodies.

277  
278 Multiple-extremes have been quantified a new method of looking at extremes which allows  
279 us to develop hypotheses for biochemical effects of multiple extremes.

280

281

## 282 Materials and Methods

283

### 284 **Strain and growth conditions**

285

286 The bacterium *Halomonas hydrothermalis* was selected for this study. It was isolated from  
287 an extreme hydrothermal environment [23] and is adapted to a wide range of stresses [15].  
288 From the family *Halomonadacaceae*, popular in research on osmotic adaptation due to their  
289 moderately halophilic nature [16], this bacterium has well-documented boundaries of growth,  
290 exhibiting cell division across temperatures of 2 to 40°C (optimal growth reported at 30°C),  
291 total salt concentrations of 0.5% to 22% (wt/vol) (optimal range of 4% to 7% (wt/vol)), and pH  
292 values of 5 to 12 (optimal range of 7 to 8) [15],[23]. Although the salt-tolerance of this  
293 organism has been constrained, nothing is known about required nutrient levels for cell  
294 division to occur.

295

296 The organism was cultured in a marine-minimal media as described by Ostling et al., 1991  
297 [24], with the following recipe: (a) 920 ml 1.1 x NSS (artificial seawater) [25]; (b) 10 ml 132  
298 mM K<sub>2</sub>HPO<sub>4</sub>; (c) 10 ml 952 mM NH<sub>4</sub>Cl (pH 7.8), and the following sterile filtered solutions;

299 (d) 10 ml 0.4 M tricine, 1 mM FeSO<sub>4</sub> • 7 H<sub>2</sub>O (pH 7.8); (e) 40 ml 1 M MOPS (potassium  
300 morpholinopropane sulfonate, pH adjusted to 8.2 with NaOH); (f) 10 ml of 20% glucose stock  
301 solution.

302

### 303 **Choice of stress conditions**

304

305 Laboratory experiments were conducted to study the effect of NaCl-salt and P<sub>i</sub> stressors and  
306 co-stressors on the growth of the organism *Halomonas hydrothermalis*. These  
307 measurements allowed us to test at the physiological level whether there is an interaction  
308 between nutrient limitation and salinity, and how this was affected as extremes of life were  
309 approached [26]. Salt limitation was chosen because of the prevalence of salinity as a  
310 variable factor in many extreme environments, including evaporites, volcanic pools, and  
311 hydrothermal vents [27],[28] and is of considerable interest in astrobiology and the assessing  
312 the habitability of extraterrestrial environments [29], since saline environments have been  
313 observed elsewhere in our Solar System [30]. In addition to being confronted with physical  
314 and chemical extremes, microbes are often limited for nutrients. Phosphorus, in the form of  
315 inorganic Pi (P<sub>i</sub>), is limiting in many natural ecosystems and is one of the most important  
316 macronutrients for maintaining cellular functions [31]. Both factors have prevalence in the  
317 habitability of Earth's oceans, and could be extended to understanding the habitability of  
318 aqueous environments beyond the Earth. Furthermore, the interaction of these two extremes  
319 is virtually unknown outside of soil ecology, and following this, this study aims to provide an  
320 insight into synergy between salinity and P<sub>i</sub> concentration in other extreme environments,  
321 such as hydrothermal environments from which our model organism was isolated.

322

323

### 324 ***Halomonas hydrothermalis* growth curve experiments**

325

326 An exponential-phase culture was obtained by growing the bacterium in marine-minimal  
327 media and incubating at 30°C. Aliquots were prepared (50% [vol/vol] glycerol) for storage at  
328 -80°C. The stored cultures were used to inoculate marine-minimal agar (3.5% [wt/vol] NaCl),  
329 which was incubated at 30°C for 48 h and stored at 4°C until use. Cultures were left  
330 overnight in a shaking incubator at 30° C and prior to experiments, cells were washed to  
331 remove any residual P<sub>i</sub>. This was done using a Fisher Scientific TopMix FB15014 vortex to  
332 mix the culture, then washing cells with P<sub>i</sub> -free media using a Thermo Electron Corporation  
333 Inc MicroCL17 centrifuge for 2 minutes at 5-G to leave a pellet. The supernatant was  
334 removed and replaced with phosphate-free marine minimal media. This process was  
335 repeated 3 times. Cells were then diluted to give a cell density equivalent to an optical  
336 density at 600nm (OD<sub>600</sub>) of 0.4.

337

338 A Greiner-Bio Flat Bottom 96-well plate was used for experimental layout, with varying  
339 salinity (0-8% [wt/vol]) and P<sub>i</sub> (0-0.21 M) across the plate. All experiments were conducted at  
340 30°C. Optical density measurements were carried out over 24 hours using a BMG Labtech  
341 SpectroSTAR Nano Microplate Reader (manufacturer and location) taking reads every 1.5  
342 minutes. Growth rates ( $\mu$ ) were calculated using the exponential growth curve phase and  
343 measured using Equation 1 [32].

344

345

346 
$$\mu = \frac{2.303(\log OD_2 - OD_1)}{(t_2 - t_1)} \text{ Equation (1)}$$

347

348

349

350

351 **Statistical Analysis**

352

353 Interaction between salinity and  $P_i$  concentrations was investigated using multiple regression  
354 analysis. An initial analysis of variance (ANOVA) test was carried out using JMP software  
355 (JMP Version 12, SAS Institute Inc, Cary, NC), leading to an effects test to investigate the  
356 synergy between the two stresses. Data was Box-Cox transformed to reduce skew in  
357 distribution and a Posthoc Tukey Honest Significance Difference (HSD) test was undertaken  
358 to analyse the difference in least square means values.

359

### 360 **Data Fitting**

361

362 Experimental data was split into three data sets: dataset 1, in which growth was influenced  
363 by both  $P_i$  limitation and salinity extremes, dataset 2, where growth is only affected by  
364 salinity and dataset 3 where growth is only affected by  $P_i$  limitation. To test whether the  
365 multiplicative or minimizing method exhibited the greatest effect on growth, an unpaired, two  
366 sample *t*-test was carried out. This compares a mean and predicted standard deviation for  
367 datasets 2 and 3 combined (derived either to fit the multiplicative or minimizing method) with  
368 the mean and standard deviation for dataset 1.

369

370 To predict a standard deviation for the multiplicative approach, a Gaussian, normal  
371 distribution was assumed for simplicity. The product of variables in relation to dataset 2 and  
372 dataset 3 was calculated to give a predicted multiplicative variance of the two combined. For  
373 the minimizing approach, the distribution of the minimum of random Gaussian variables,  
374 moments  $Y=\min(X_1, X_2)$  [33] were applied using probability density function and cumulative  
375 distribution functions to predict an overall variance.

376

377 For investigations into which of the two stresses had a greater effect on growth, a one-sided  
378 students *t*-test was carried out between the two distributions in R-studio. This showed  
379 whether the average of the salinity factor for replicates is greater than average of the nutrient  
380 limitation factor. Results were visualised using heat maps produced in R Studio; showing the

381 fit of the two methods, growth rate values, which stress dominated at which combination of  
382 stresses, and similarity in fit of the two models. The latter was calculated using the difference  
383 between  $p$ -values for the multiplicative and minimizing models, then dividing results into 40  
384 categories between 0 and the maximum difference, 0.0881. Each of these categories was  
385 assigned a number between 1 and 10 in increments of 0.25 to visualise the goodness of fit  
386 of the two models.

387

388

### 389 Acknowledgements

390

391 A huge thank you to Dr Rosalind Allen and Dr Rebecca Prescott at The University of  
392 Edinburgh for their statistical guidance through this work. Also thanks to the Principal's  
393 Career Development Scholarship at The University of Edinburgh for funding this work.  
394 Charles Cockell was supported by Science and Technologies Facilities Council Grant  
395 number: ST/R000875/1.

### 396 References

397

398 1. Rothschild L, Mancinelli R. 2001. Life in extreme environments. *Nature* 409:1092–  
399 1101.

400

401 2. Harrison J, Cockell C. 2013. The limits for life under multiple extremes. *Trends in*  
402 *Microbiology* 21:204-212.

403

404 3. Merino N, Aronson H, Bojanova D, Feyhl-Buska J, Wong M, Zhang S, Donato G.  
405 2019. Living at the Extremes: Extremophiles and the Limits of Life in a Planetary  
406 Context. *Frontiers in Microbiology*. 10:780.

407

- 408 4. Saito MA, Goepfert TJ, Ritt, Jason T. 2008. Some thoughts on the concept of  
409 colimitation: Three definitions and the importance of bioavailability. *Limnology and*  
410 *Oceanography* 1;53: 276-290.
- 411
- 412 5. Spijkerman E, De Castro F, Gaedke U. 2011. Independent Colimitation for Carbon  
413 Dioxide and Inorganic Phosphorus. *PLOS ONE* 12:1-12.
- 414
- 415 6. Darvehei P, Bahri PA, Moheimani NR. 2018. Model development for the growth of  
416 microalgae: A review. *Renewable and Sustainable Energy Reviews* 97:233-258.
- 417
- 418 7. Bader, F. 1978. Analysis of Double-Substrate Limited Growth. *Biotechnology and*  
419 *Bioengineering* 20:183-202.
- 420
- 421 8. Liess M, Foit K, Knillmann S, Schäfer RB, Liess, H. 2016. Predicting the synergy of  
422 multiple stress effects. *Scientific Reports* 6:32965.
- 423
- 424 9. Ross T, Ratkowsky D, Mellefont L, Mcmeekin R. 2003. Modelling the effects of  
425 temperature, water activity, pH and lactic acid concentration on the growth rate of  
426 *Escherichia coli*. *International journal of food microbiology* 82:33-43.
- 427
- 428 10. Monod J. 1949. The Growth of Bacterial Cultures. *Annual Review of Microbiology*  
429 3:371–394.
- 430 11. Egli T, Zinn M. 2003. The concept of multiple-nutrient-limited growth of  
431 microorganisms and its application in biotechnological processes. *Biotechnology*  
432 *advances* 22:35-43.
- 433



- 434 12. Droop MR. 1978. Some Thoughts on Nutrient Limitation in Algae. Journal of  
435 Phycology 9:264-262.
- 436
- 437 13. Sperfeld E, Martin-Creuzburg D, Wacker A. 2012. Multiple resource limitation theory  
438 applied to herbivorous consumers: Liebig's minimum rule vs. interactive co-limitation.  
439 Ecology Letters 15:142-150.
- 440
- 441 14. Stewart HA, Al-Omari A, Bott C, De Clippeleir H, Su C, Takacs I, Wett B, Massoudieh  
442 A, Murthy S. 2017. Dual Substrate Limitation Modeling and Implications for  
443 Mainstream Deammonification. Water Research 1;116:95-105.
- 444
- 445 15. Harrison JP, Hallsworth JE, Cockell CS. 2015. Reduction of the Temperature Sensitivity  
446 of *Halomonas hydrothermalis* by Iron Starvation Combined with Microaerobic Conditions.  
447 Applied and Environmental Microbiology. 6;81:2156-62.
- 448
- 449 16. Gunde-Cimerman N, Plemenitaš A, Oren A. 2018. Strategies of adaptation of  
450 microorganisms of the three domains of life to high salt concentrations. FEMS  
451 Microbiology Reviews 3;42:353–375.
- 452
- 453 17. Csonka LN. 1989. Physiological and genetic responses of bacteria to osmotic  
454 stress. Microbiological reviews 1;53:121–147.
- 455
- 456 18. Rai AK, Sharma NK. 2006. Phosphate Metabolism in the  
457 Cyanobacterium *Anabaena doliolum* Under Salt Stress. Current Microbiology.  
458 1;52:6-12.
- 459

- 460 19. Jansson M. 1988. Phosphate uptake and utilization by bacteria and algae.  
461 Hydrobiologia. 1;170:177–189.
- 462
- 463 20. Kulakovskaya TV, Lichko LP, Ryazanova LP. 2014. Diversity of phosphorus  
464 reserves in microorganisms. Biochemistry Moscow 79:1602-1614.
- 465
- 466 21. Zhu F, Qu L, Hong X, Sun, X. 2011. Isolation and Characterization of a Phosphate-  
467 Solubilizing Halophilic Bacterium *Kushneria* sp. YCWA18 from Daqiao Saltern on the  
468 Coast of Yellow Sea of China. Evidence-Based Complementary and Alternative  
469 Medicine 615032.
- 470
- 471 22. Oren A. 2011. Thermodynamic limits to microbial life at high salt concentrations.  
472 Environmental Microbiology 8;13:1908-1923.
- 473
- 474 23. Kaye JZ, Márquez MC, Ventosa A, Baross JA. 2004. *Halomonas neptunia* sp.  
475 nov., *Halomonas sulfidaeris* sp. nov., *Halomonas axialensis* sp. nov. and *Halomonas*  
476 *hydrothermalis* sp. nov.: halophilic bacteria isolated from deep-sea hydrothermal-vent  
477 environments. International Journal of Systematic and Evolutionary Microbiology  
478 54:499-511.
- 479
- 480 24. Östling J, Goodman A, Kjelleberg S. 1991. Behaviour of IncP-1 plasmids and a  
481 miniMu transposon in a marine *Vibrio* sp.: isolation of starvation inducible lac operon  
482 fusions. FEMS Microbiology Letters. 1;86:83–93.
- 483
- 484 25. Nyström T, Kjelleberg S. 1987. The effect of cadmium on starved heterotrophic  
485 bacteria isolated from marine waters. FEMS Microbiology Ecology 3;3:143–151.

486

487 26. Lelong A, Bucciarelli E, Hégaret H, Soudant P. 2013. Iron and copper limitations  
488 differently affect growth rates and photosynthetic and physiological parameters of the  
489 marine diatom *Pseudonitzschia delicatissima*. *Limnology and Oceanography*  
490 2;58:613-623.

491

492 27. Hynek B, Osterloo M, Kierein-Young K. 2015. Late-stage formation of Martian  
493 chloride salts through ponding and evaporation. *Geology* 9;43:787-790.

494

495 28. Dalton JB, Prieto-Ballesteros O, Kargel JS, Jamieson CS, Jolivet J, Quinn R. 2005.  
496 Spectral comparison of heavily hydrated salts with disrupted terrains on Europa.  
497 *Icarus*. 2;177:472-490.

498

499 29. Domagal-Goldman SD, Wright KE, Adamala K, Arina de la Rubia L, Bond J, Dartnell  
500 LR, Goldman AD, Lynch K, Naud ME, Paulino-Lima IG, Singer K, Walther-Antonio M,  
501 Abrevaya XC, Anderson R, Arney G, Atri D, Azúa-Bustos A, Bowman JS, Brazelton  
502 WJ, Brennecka GA, Carns R, Chopra A, Colangelo-Lillis J, Crockett CJ, DeMarines  
503 J, Frank EA, Frantz C, de la Fuente E, Galante D, Glass J, Gleeson D, Glein CR,  
504 Goldblatt C, Horak R, Horodyskyj L, Kaçar B, Kereszturi A, Knowles E, Mayeur P,  
505 McGlynn S, Miguel Y, Montgomery M, Neish C, Noack L, Rugheimer S, Stüeken EE,  
506 Tamez-Hidalgo P, Imari Walker S, Wong T. 2016. The Astrobiology Primer v2.0.  
507 *Astrobiology* 8;16:561-653.

508

509 30. Osterloo MM, Anderson FS, Hamilton VE, Hynek BM. 2010. Geologic context of  
510 proposed chloride-bearing materials on Mars. *Journal of Geophysical Research* 115;  
511 E10012.

512

- 513 31. Burut-Archanai S, Eaton-Rye JJ, Incharoensakdi A. 2011. Na<sup>+</sup>-stimulated phosphate  
514 uptake system in *Synechocystis* sp. PCC 6803 with Pst1 as a main transporter. BMC  
515 Microbiology 11;11:225.
- 516
- 517 32. Omotoyinbo OV, Omotoyinbo BI. 2016. Effect of Varying NaCl Concentrations on the  
518 Growth Curve of *Escherichia coli* and *Staphylococcus aureus*, Cell Biology 5;4:31-34.
- 519
- 520 33. Nadarajah S, Kotz S. 2008. Exact Distribution of the Max/Min of Two Gaussian  
521 Random Variables. IEEE Transactions on Very Large Scale Integration (VLSI)  
522 Systems. 2;16:210-212.

### Analysis of Variance

| Source          | DF    | Sum of Squares | Mean Square | F Ratio            |
|-----------------|-------|----------------|-------------|--------------------|
| <b>Model</b>    | 322   | 8204.3286      | 25.4793     | 429.9880           |
| <b>Error</b>    | 29420 | 1747.4535      | 0.0593      | <b>Prob &gt; F</b> |
| <b>C. Total</b> | 29812 | 9951.7820      |             | < 0.001*           |

### Effect Tests

| Source                    | Nparm | DF  | Sum of Squares | F Ratio  | Prob > F |
|---------------------------|-------|-----|----------------|----------|----------|
| <b>Time</b>               | 249   | 249 | 5001.0525      | 338.9466 | < 0.001* |
| <b>Salinity</b>           | 9     | 3   | 874.3593       | 4918.559 | < 0.001* |
| <b>Phosphate</b>          | 7     | 6   | 34.3414        | 96.5908  | < 0.001* |
| <b>Salinity*Phosphate</b> | 63    | 57  | 303.9087       | 89.9782  | < 0.001* |

**Table 1** – Results of ANOVA investigating effects of phosphate and salinity over time on growth of the organism *H. hydrothermalis*.

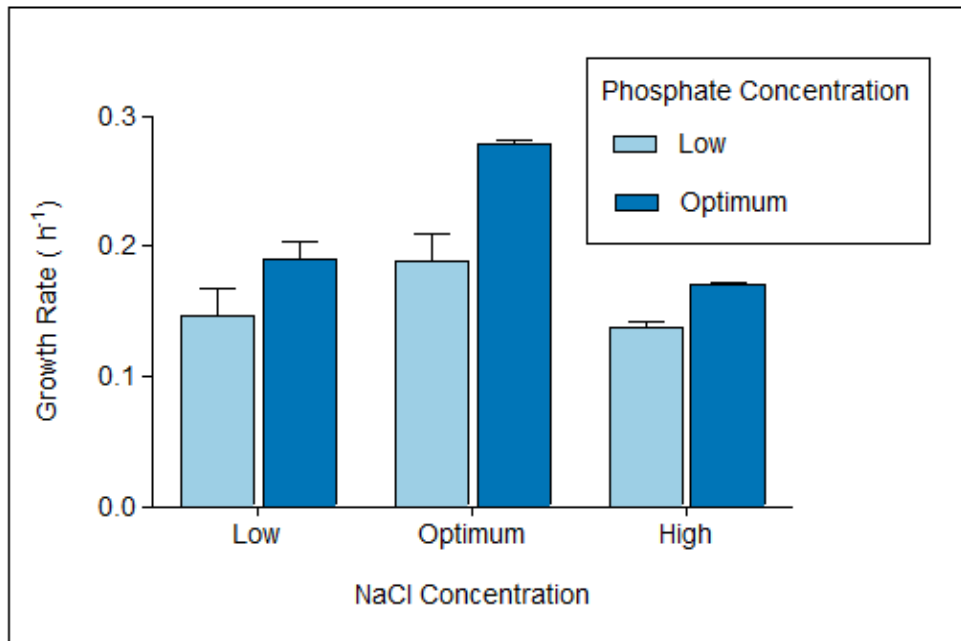

**Figure 1** – Growth rates of the organism *Halomonas hydrothermalis* under combined NaCl and Pi limitation. Growth rates were calculated from growth curves as described in Materials and Methods. Data are presented as untransformed means  $\pm$  standard errors of the means (SE).

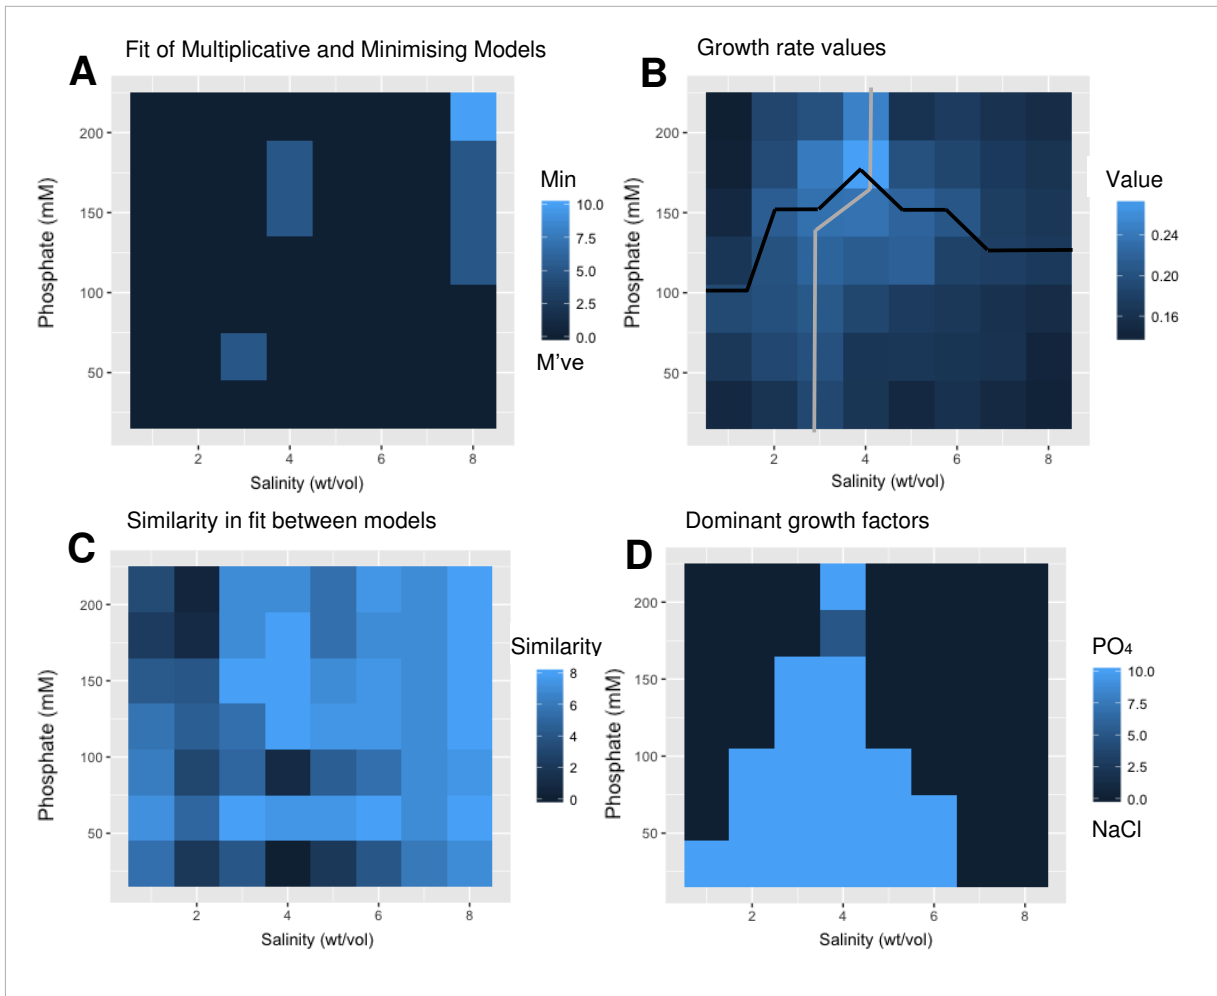

**Figure 2** – Fitting minimizing and multiplicative models to life in extremes. Heat maps showing quantitative analysis of growth under combined salt and  $P_i$  stresses. (A) Fit of multiplicative to minimizing model; best fit to multiplicative model shown in dark blue and minimizing light blue. (B) Growth rate ( $\mu$ ) under different combinations of salt and  $P_i$ , showing optimal salt concentrations (grey line) and optimal  $P_i$  concentrations (black line). (C) Similarity between fit of multiplicative and minimizing models – light blue = similar fit and dark blue = large difference in fit. (D) Whether salt or  $P_i$  dominated growth - light blue =  $P_i$ , dark blue = salinity.
